# Supplementary material
Source: Springer Nature journal article supplement (https://www.springermedizin.de/resource/supplementary/12865_2006_118_MOESM4_ESM.pdf/9428608)

AGN2a/DEK

AGN2a

AGN2a/DEK (control)

A

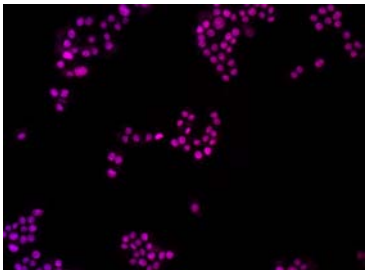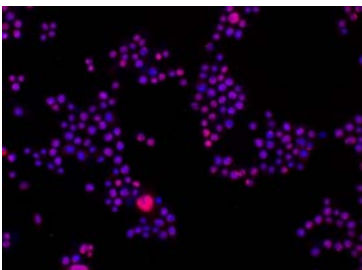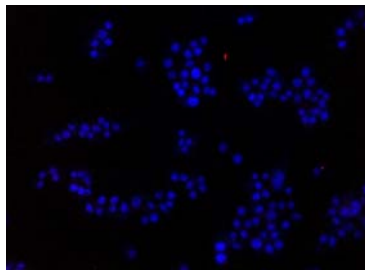

B

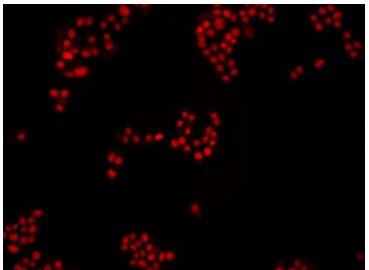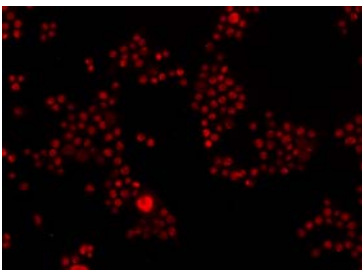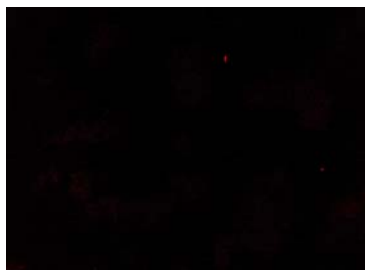

Supplement: MOESM4 [file 9428608]
